# Supplementary material
Source: Research Square preprint supplement (doi:10.21203/rs.3.rs-9161846/v1)
Supplement: Supplementary file 1 [file 42c0561457e57750f37a1a19.docx]

**Table 2.** Comparison of the performance of the models on the test set.

| Model | Accuracy | Precision | Recall | F1-score |
| --- | --- | --- | --- | --- |
| LOG | 0.928 | 0.953 | 0.928 | 0.937 |
| RF | 0.973 | 0.977 | 0.973 | 0.974 |
| XGBoost | 0.982 | 0.983 | 0.982 | 0.982 |
| SVM | 0.827 | 0.994 | 0.827 | 0.871 |
| MLP | 0.955 | 0.963 | 0.955 | 0.958 |
| **Our method** | **0.989** | **0.990** | **0.989** | **0.989** |

LOG = Logistic Regression; RF = Random Forest; SVM = Support Vector Machine; MLP = Multilayer Perceptron. Metrics range: [0,1] (higher values indicate better performance).
