# Supplementary material
Source: Research Square preprint supplement (doi:10.21203/rs.3.rs-9161846/v1)
Supplement: Supplementary file 2 [file ad0b94528b6ff53ae7daa2d8.docx]

**Table 3.** Ablation Study.

| Model | Accuracy | Precision | Recall | F1-score |
| --- | --- | --- | --- | --- |
| Transformer | 0.976 | 0.982 | 0.976 | 0.978 |
| Five-fold Cross-Validation | 0.988 | 0.988 | 0.988 | 0.988 |
| Wavelet Convolution | 0.948 | 0.899 | 0.948 | 0.923 |
| Gating Mechanism | 0.989 | 0.990 | 0.989 | 0.989 |
| Data Augmentation | 0.990 | 0.989 | 0.990 | 0.990 |
| **Our method** | **0.990** | **0.990** | **0.990** | **0.990** |
