# Supplementary material
Source: Research Square preprint supplement (doi:10.21203/rs.3.rs-9161846/v1)
Supplement: Supplementary file 3 [file fc7cbeffcaa9df1dfe7d0052.docx]

**Table 1.** Key variables of the Tianjin University Chest Hospital Cardiology Department Dataset.

| ID | Diabetes | ACEI | hs-CRP (mg/L) | Contrast Dose (mL) | Postop Scr (umol/L) | CIN |
| --- | --- | --- | --- | --- | --- | --- |
| S01 | 0 | 1 | 0.45 | 150 | 105.3 | 0 |
| S02 | 0 | 1 | 0.89 | 150 | 112.4 | 0 |
| S03 | 1 | 1 | 0.24 | 50 | 144 | 1 |
| S04 | 0 | 1 | 0.18 | 160 | 107.3 | 0 |
| S05 | 1 | 1 | 0.33 | 220 | 113.1 | 0 |
| S06 | 0 | 1 | 0.35 | 220 | 104.1 | 0 |

Diabetes (presence: 1 = Yes, 0 = No), ACEI (Angiotensin-converting enzyme inhibitor use: 1 = Yes, 0 = No), hs-CRP (high-sensitivity C-reactive protein, mg/L), Contrast Dose (volume of iodinated contrast media administered, mL), Postop Scr (Postoperative serum creatinine, μmol/L), and CIN (Contrast-induced nephropathy diagnosis: 1 = Positive, 0 = Negative).
